# Supplementary material for: A seed-mediated and double shell strategy to realize large-size ZnSe/ZnS/ZnS quantum dots for high color purity blue light-emitting diodes
Source: Royal Society of Chemistry journal article supplement (doi:10.1039/d0nr05025c), 2021-01-01
Supplement: d0nr05025c1.pdf [file d0nr05025c1.pdf]

Electronic Supplementary Material (ESI) for Nanoscale.  
This journal is © The Royal Society of Chemistry 2020

## Supporting Information

Seed-mediated and double shell strategy to realize large-size ZnSe/ZnS/ZnS quantum dots for high color purity blue light-emitting diodes

*Zhiwen Yang<sup>1</sup>, Qianqian Wu<sup>2</sup>, Xiaochuan Zhou<sup>1</sup>, Fan Cao<sup>2</sup>, Xuyong Yang<sup>2, \*</sup>, Jianhua Zhang<sup>2, \*</sup>, and Wanwan Li<sup>1, \*</sup>*

[\*] Prof. W. Li, Dr. Z. Yang, X. Zhou

State Key Lab of Metal Matrix Composites, School of Materials Science and Engineering, Shanghai Jiao Tong University, 800 Dongchuan Road, Shanghai 200240, P. R. China

E-mail: wwli@sjtu.edu.cn

[\*] Prof. X. Yang, [\*] Prof. J. Zhang, Dr. Q. Wu, F. Cao

Key Laboratory of Advanced Display and System Applications of Ministry of Education, Shanghai University, Shanghai 200072, China

E-mail: yangxy@shu.edu.cn, jhzhang@shu.edu.cn

## SUPPORTING TABLE

**Table S1.** Comparison of our work with some typical Cd-free blue QDs and QLEDs reported in literature.

| QDs                                          | PL                             |              |           | EL                             |              |                |                                |                    |                                             | Refs         |
|----------------------------------------------|--------------------------------|--------------|-----------|--------------------------------|--------------|----------------|--------------------------------|--------------------|---------------------------------------------|--------------|
|                                              | $\lambda_{\text{max}}$<br>(nm) | FWHM<br>(nm) | QY<br>(%) | $\lambda_{\text{max}}$<br>(nm) | FWHM<br>(nm) | Peak<br>EQE(%) | Max.L<br>(cd m <sup>-2</sup> ) | CIE<br>coordinates | T <sub>50</sub> @<br>100 cd m <sup>-2</sup> |              |
| ZnSe/ZnS/ZnS                                 | 444                            | 14           | 53        | 446                            | 16           | 2.62           | 106                            | (0.16, 0.02)       | 3                                           | This<br>work |
| ZnSe/ZnS                                     | 420                            | 16           | 40        | 425                            | /            | 0.65           | /                              | /                  | /                                           | 1            |
| ZnSe/ZnS                                     | 439                            | 11           | 60        | 441                            | 15.2         | /              | 1170                           | (0.16, 0.15)       | /                                           | 2            |
| ZnSe/ZnS                                     | 435                            | 16           | 40        | 435                            | /            | /              | 25                             | /                  | /                                           | 3            |
| ZnSe/ZnS                                     | 425                            | 16           | 83        | 429                            | 20.4         | 7.83           | 2632                           | (0.169, 0.023)     | /                                           | 4            |
| ZnSe/ZnS                                     | 425                            | /            | 80        | 429                            | 21           | 7.4            | 2856                           | /                  | /                                           | 5            |
| ZnSe/ZnS                                     | 445                            | <15          | 64        | 445                            | 15           | 10.7           | /                              | (0.156, 0.02)      | <10                                         | 6            |
| ZnSe/ZnS                                     | 433                            | 22           | 55        | 434                            | 16           | 6.88           | 450                            | (0.166, 0.013)     | /                                           | 7            |
| ZnSe/ZnSe <sub>x</sub> S <sub>1-x</sub> /ZnS | 444                            | 23.3         | 77.2      | 452                            | /            | 5.32           | 3754                           | (0.155, 0.025)     | 1.27                                        | 8            |
| InP/ZnS                                      | 477                            | 44           | 76        | 488                            | 45           | /              | 90                             | (0.13, 0.22)       | /                                           | 9            |
| InP/GaP/ZnS/ZnS                              | 478                            | 45           | 81        | 488                            | 50           | 1.01           | 3120                           | (0.17, 0.24)       | 2                                           | 10           |
| InP/ZnS/ZnS                                  | 468                            | 47           | 45        | 485                            | /            | 1.7            | 140                            | /                  | 0.067                                       | 11           |
| ZnSeTe/ZnSe/ZnS                              | 441                            | 32           | 70        | 445                            | /            | 4.2            | 1195                           | (0.15, 0.049)      | 0.24                                        | 12           |
| ZnSe:Te/ZnSeS/ZnS                            | 450                            | 41           | 32        | 455                            | 40           | 0.33           | 261                            | /                  | /                                           | 13           |
| ZnSeTe/ZnSe/<br>ZnSeS/ZnS                    | 445                            | 27           | 84        | 447                            | 28           | 9.5            | 2904                           | (0.148, 0.048)     | /                                           | 14           |
| ZnTeSe/ZnSe/ZnS                              | 457                            | 36           | 100       | 460                            | 35           | 20.2           | 88900                          | /                  | 15850                                       | 15           |

PL, photoluminescence; EL, electroluminescence; FWHM, full widths at half maximum; QY, quantum yield; EQE, external quantum efficiency.

## SUPPORTING FIGURES

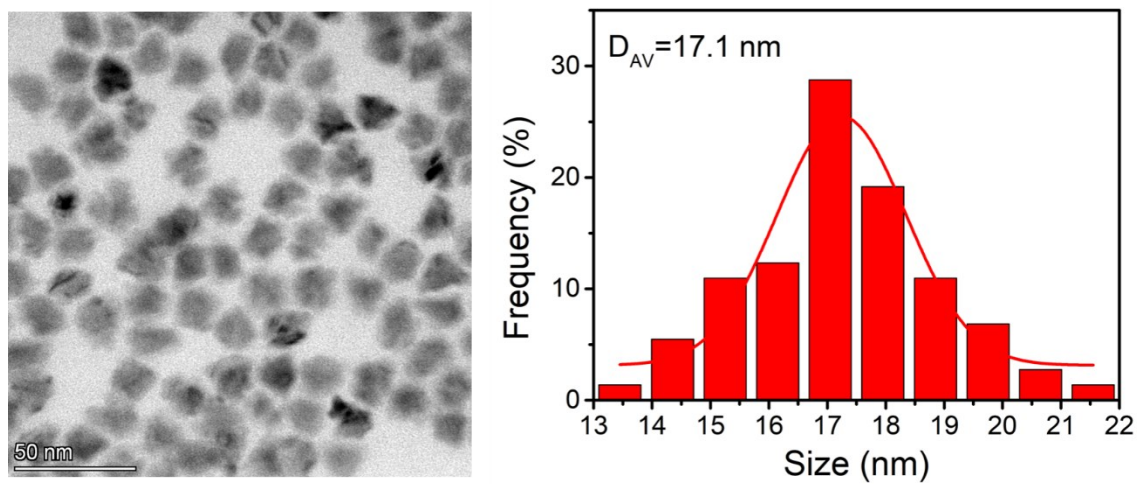

**Figure S1.** HTEM image and size distribution of ZnSe/ZnS/ZnS QDs.

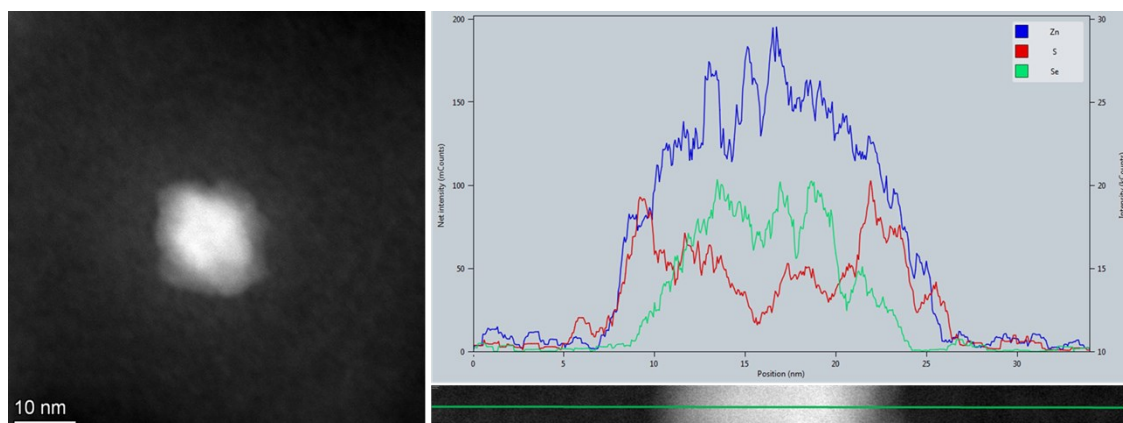

**Figure S2.** Elemental profiles of Zn, Se, and S from a typical ZnSe/ZnS/ZnS QD.

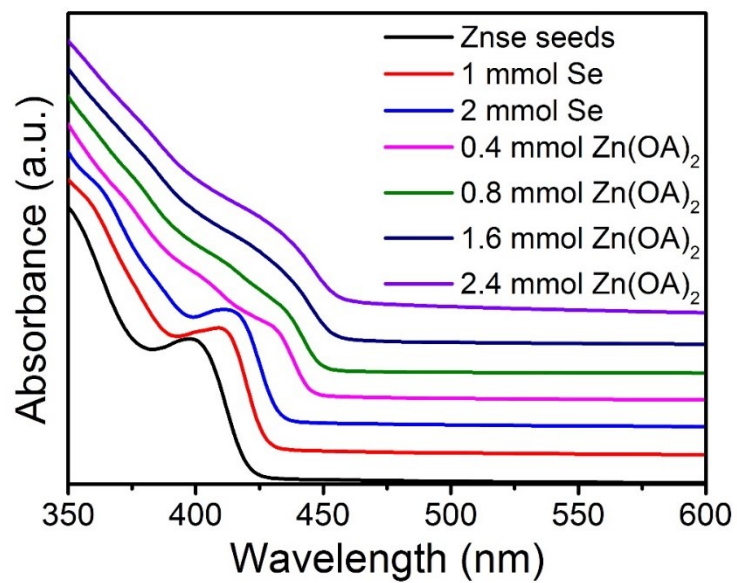

**Figure S3.** Absorption spectra evolution from ZnSe seeds to ZnSe cores.

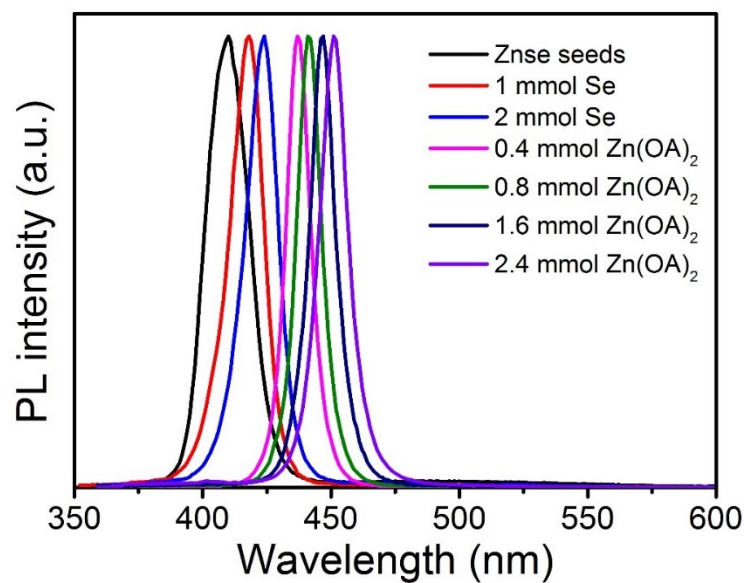

**Figure S4.** Photoluminescence spectra evolution from ZnSe seeds to ZnSe cores.

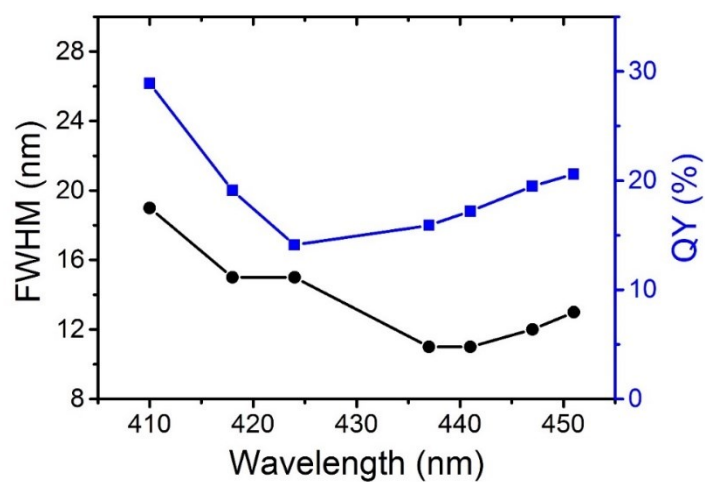

**Figure S5.** FWHM and PLQY variation from ZnSe seeds to ZnSe cores.

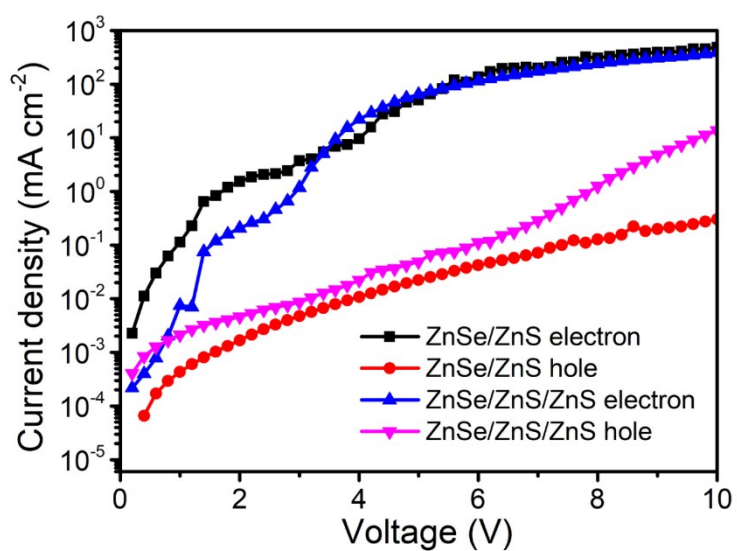

**Figure S6.** Current density-voltage characteristics of the electron-only and hole-only dominant devices.

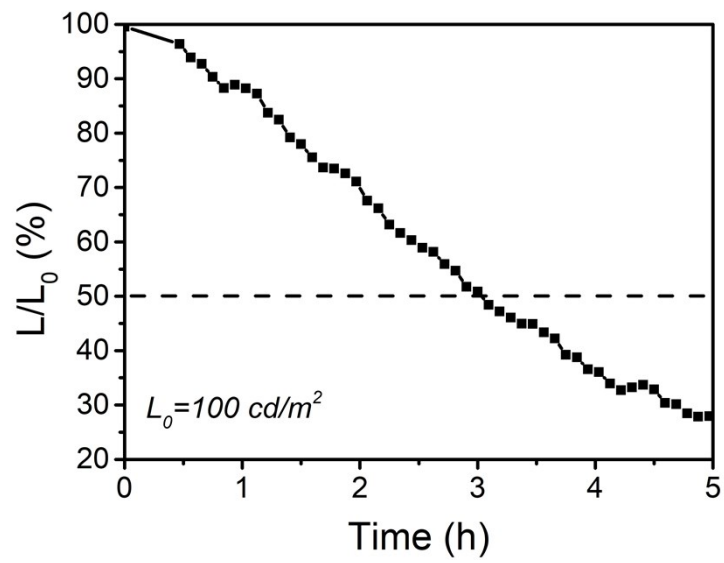

**Figure S7.** Operational lifetime characteristics of ZnSe/ZnS/ZnS QD-based QLEDs under an initial luminance of  $100 \text{ cd m}^{-2}$ .

## References:

1. C. Xiang, W. Koo, S. Chen, F. So, X. Liu, X. Kong and Y. Wang, *Applied Physics Letters*, 2012, **101**, 053303.
2. W. Ji, P. Jing, W. Xu, X. Yuan, Y. Wang, J. Zhao and A. K.-Y. Jen, *Applied Physics Letters*, 2013, **103**, 053106.
3. C. Ippen, T. Greco, Y. Kim, J. Kim, M. S. Oh, C. J. Han and A. Wedel, *Organic Electronics*, 2014, **15**, 126-131.
4. A. Wang, H. Shen, S. Zang, Q. Lin, H. Wang, L. Qian, J. Niu and L. Song Li, *Nanoscale*, 2015, **7**, 2951-2959.
5. Q. Lin, H. Shen, H. Wang, A. Wang, J. Niu, L. Qian, F. Guo and L. S. Li, *Organic Electronics*, 2015, **25**, 178-183.
6. T. Ryowa, T. Ishida, Y. Sakakibara, K. Kitano, M. Ueda, M. Izumi, Y. Ogura, M. Tanaka, S. Nikata, M. Watanabe, M. Takasaki, T. Itoh and A. Miyanaga, *Journal of the Society for Information Display*, 2020, **28**, 401-409.
7. H. Cho, S. Park, H. Shin, M. Kim, H. Jang, J. Park, J. H. Yang, C. W. Han, J. H. Baek, Y. S. Jung and D. Y. Jeon, *Small*, 2020, **16**, 2002109.
8. W. H. Jung, J.-Y. Yoo, H. j. Kim, J.-G. Kim, B. D. Chin and J. S. Kim, *Opt. Mater. Express*, 2020, **10**, 3372-3383.
9. W. Shen, H. Tang, X. Yang, Z. Cao, T. Cheng, X. Wang, Z. Tan, J. You and Z. Deng, *Journal of Materials Chemistry C*, 2017, **5**, 8243-8249.
10. H. Zhang, X. Ma, Q. Lin, Z. Zeng, H. Wang, L. S. Li, H. Shen, Y. Jia and Z. Du, *The Journal of Physical Chemistry Letters*, 2020, **11**, 960-967.
11. W. Zhang, S. Ding, W. Zhuang, D. Wu, P. Liu, X. Qu, H. Liu, H. Yang, Z. Wu, K. Wang and X. W. Sun, *Advanced Functional Materials*, 2020, **n/a**, 2005303.
12. E.-P. Jang, C.-Y. Han, S.-W. Lim, J.-H. Jo, D.-Y. Jo, S.-H. Lee, S.-Y. Yoon and H. Yang, *ACS Applied Materials & Interfaces*, 2019, **11**, 46062-46069.
13. Z. Bao, Z.-F. Jiang, Q. Su, H.-D. Chiu, H. Yang, S. Chen, R.-J. Chung and R.-S. Liu, *Nanoscale*, 2020, **12**, 11556-11561.
14. C.-Y. Han, S.-H. Lee, S.-W. Song, S.-Y. Yoon, J.-H. Jo, D.-Y. Jo, H.-M. Kim, B.-J. Lee, H.-S. Kim and H. Yang, *ACS Energy Letters*, 2020, **5**, 1568-1576.

15. T. Kim, K.-H. Kim, S. Kim, S.-M. Choi, H. Jang, H.-K. Seo, H. Lee, D.-Y. Chung and E. Jang, *Nature*, 2020, **586**, 385-389.
